# Supplementary material for: EPSP Synthase-Depleted Cells Are Aromatic Amino Acid Auxotrophs in Mycobacterium smegmatis
Source: PubMed Central journal article supplement (PMC8694188; doi:10.1128/spectrum.00009-21), 2021-12-22
Supplement: spectrum00009-21_supp_1_seq2.pdf [file spectrum00009-21_supp_1_seq2.pdf]

## Supplemental Material

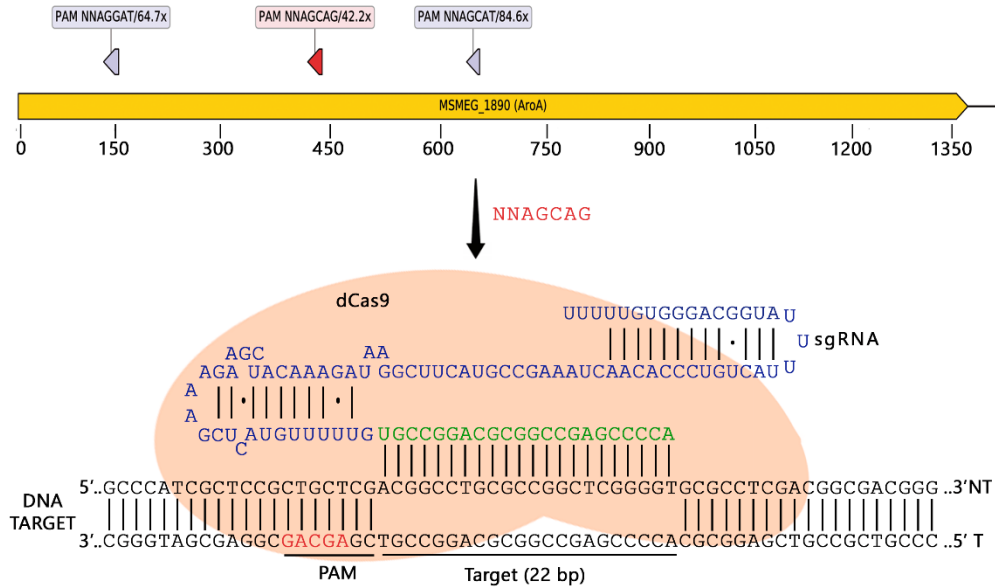

**Figure S1. Knockdown of EPSPS-encoding gene *aroA* in *M. smegmatis* using CRISPR interference (CRISPRi).** Upper part: Location of PAM sequences inside *aroA* locus used in this study. From left to right: 5'- NNAGGAT-3', 5'-NNAGCAG-3' and 5'- NNAGCAT-3'. The repression strength of each PAM sequence, according to Rock et al. (2017) (1), is also depicted. Lower part: Schematic representation of CRISPRi system associated with *aroA* locus at a target region adjacent to PAM "5'-NNAGCAG-3'". Dead Cas9 (dCas9) is represented in peach color, sgRNA as a single RNA chain in blue with annealing portion in green and paired with the non-template (NT) strand of target DNA. The "5'-AGCAG-3'" from PAM is depicted in red in the template (T) strand of target DNA in 3'-5' orientation.

21

**MESG**

22

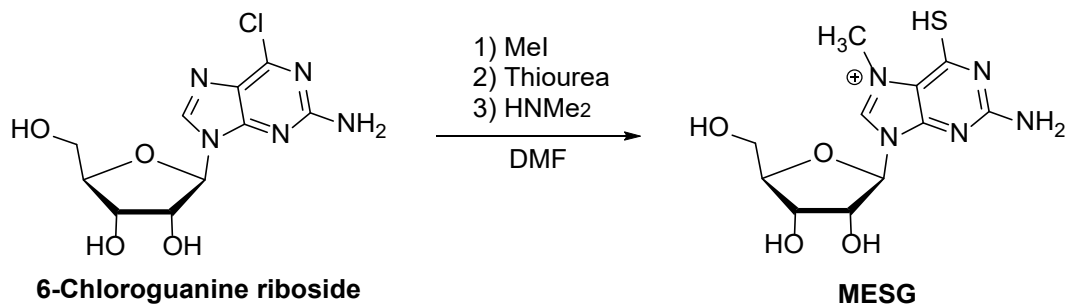

23

24

25 **Figure S2. MSG synthesis.** In a two-neck round bottom flask, under argon atmosphere, 6-  
 26 chloroguanine riboside (4.00 g, 13.25 mmol) was dissolved in dry dimethylformamide (10 mL). Then,  
 27 methyl iodide (4 mL, 64.25 mmol) was added and the mixture was stirred overnight at 30 °C. Excess  
 28 methyl iodide was removed under vacuum together with part of DMF. Then, to the residual mixture,  
 29 thiourea (2.00 g, 26.27 mmol) was added under an argon atmosphere and the mixture was stirred for  
 30 an additional hour. Afterwards, the solution was neutralized with pure dimethylamine slowly added  
 31 dropwise. The mixture was directly poured into stirred acetone (500 mL) to give a yellow precipitate  
 32 which was further chromatographed on silica and eluted with ethyl acetate/1-propanol/water (5:2:1;  
 33 v/v) yielding 0.620g (30%) of MSG. The compound was dried to a yellow solid and stored desiccated  
 34 at -80 °C. <sup>13</sup>C NMR (D<sub>2</sub>O) δ (ppm): 174.2, 156.0, 146.6, 141.1, 119.6, 90.8, 86.2, 75.1, 70.1, 61.3,  
 35 and 35.4. HRMS (ESI): calc. for [C<sub>11</sub>H<sub>16</sub>N<sub>5</sub>O<sub>4</sub>S+H]<sup>+</sup>: 314.0918; obt: 314.0916.

36

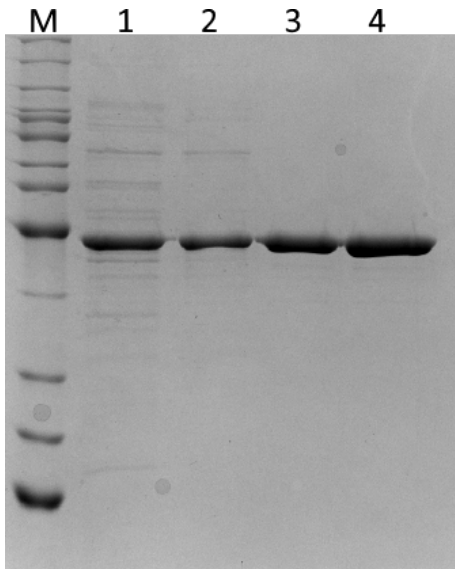

37

38 **Figure S3. SDS-PAGE of samples from the purification steps of WT *MsEPSPS*.** Lane M:  
39 BenchMark Protein Ladder (Invitrogen). Lane 1: crude extract from soluble fraction of cell disruption.  
40 Lane 2: soluble fraction from the first column (Q-Sepharose Fast Flow). Lane 3: soluble fraction from  
41 the second column (Phenyl Sepharose HP). Lane 4: soluble fraction from the third column (Mono Q  
42 HR 16/10).

43

44

45

46

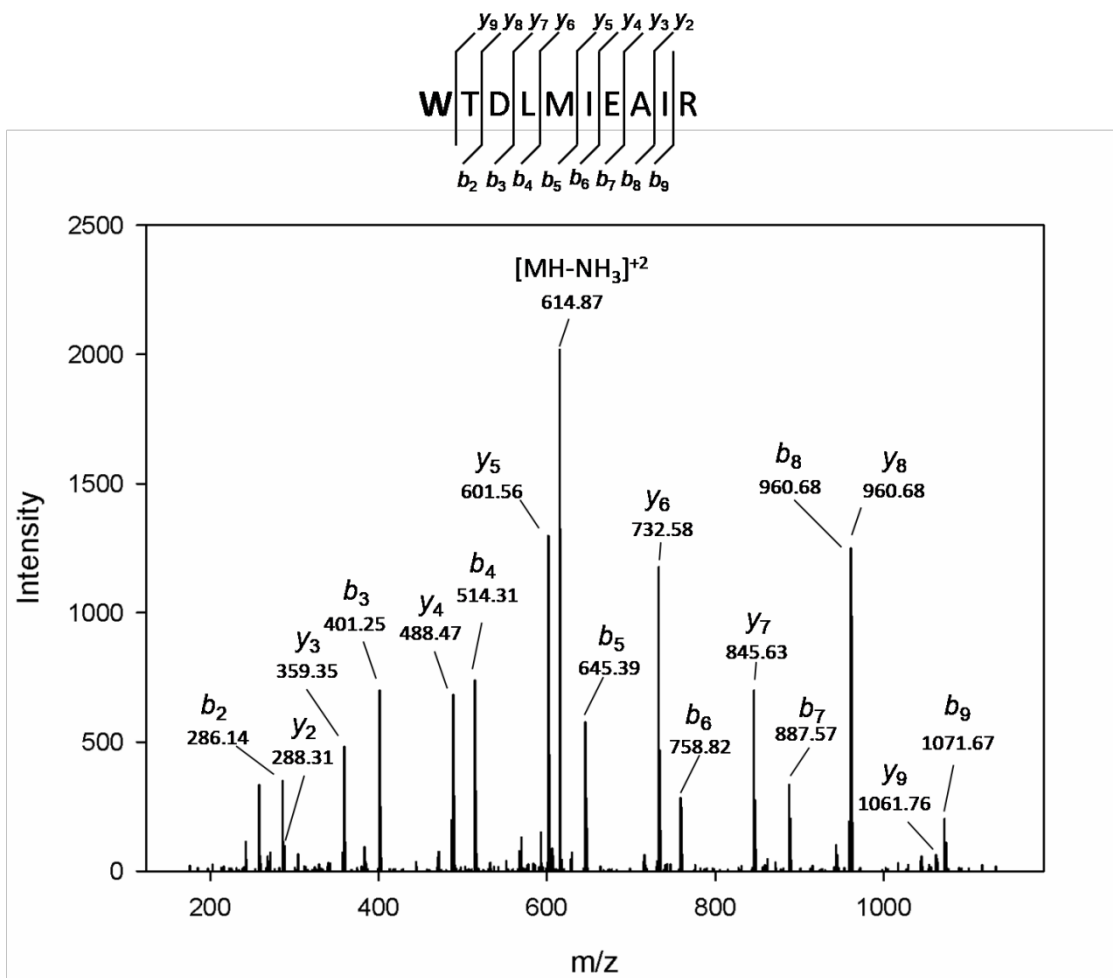

47

48 **Figure S4. Representative spectrum of peptide containing the D61W mutation obtained by LC-**  
 49 **MS/MS of *M*sEPSPS D61W protein. Peptide sequence: **WTDLMEAIR**. Point mutation marked in**  
 50 **bold. Fragment b- and y-ions and their neutral losses are indicated.**

51

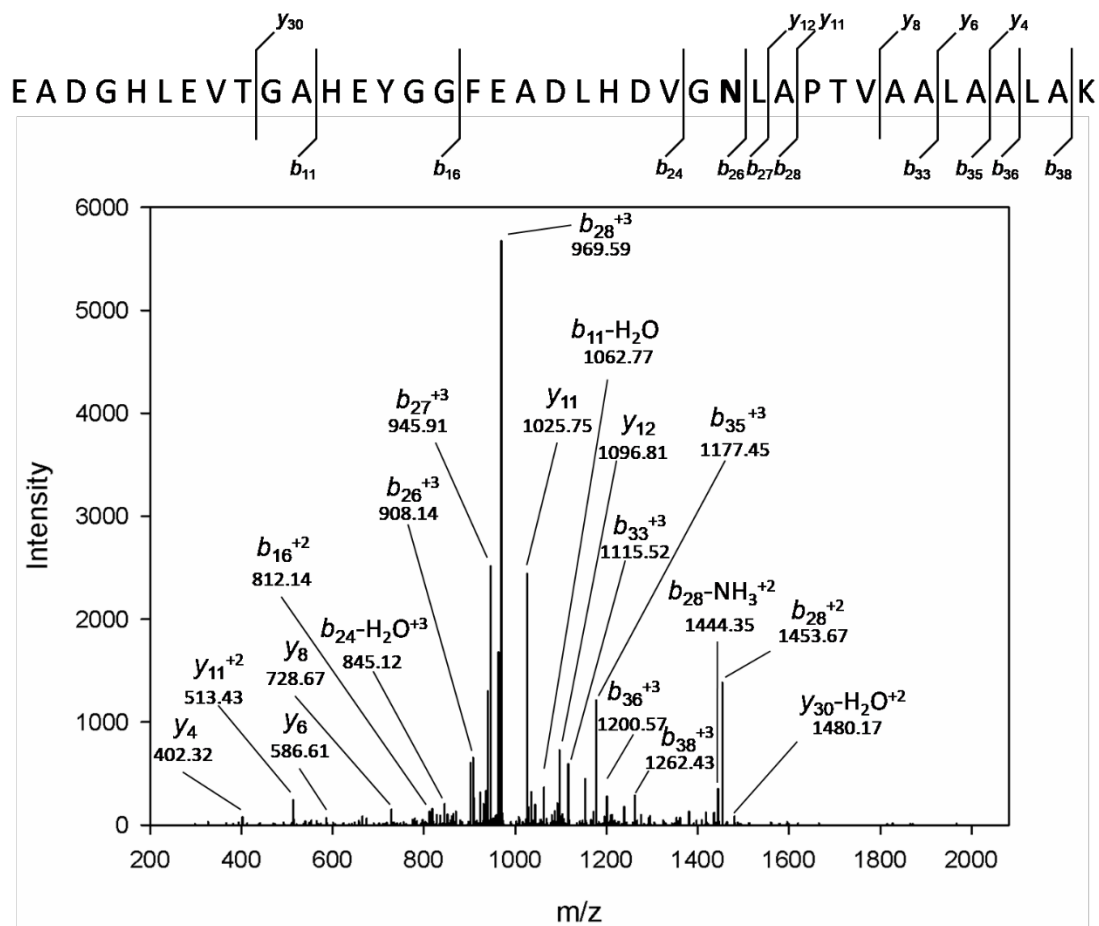

52

53 **Figure S5. Representative spectrum of peptide containing the E321N mutation obtained by**  
 54 **LC-MS/MS of *Ms*EPSPS E321N protein.** Peptide sequence: EADGHLEVTGAHEYGGFEADLHDVGN  
 55 **N**LAPTVAALAALAK. Point mutation marked in **bold**. Fragment b- and y-ions and their neutral loses  
 56 are indicated.

57

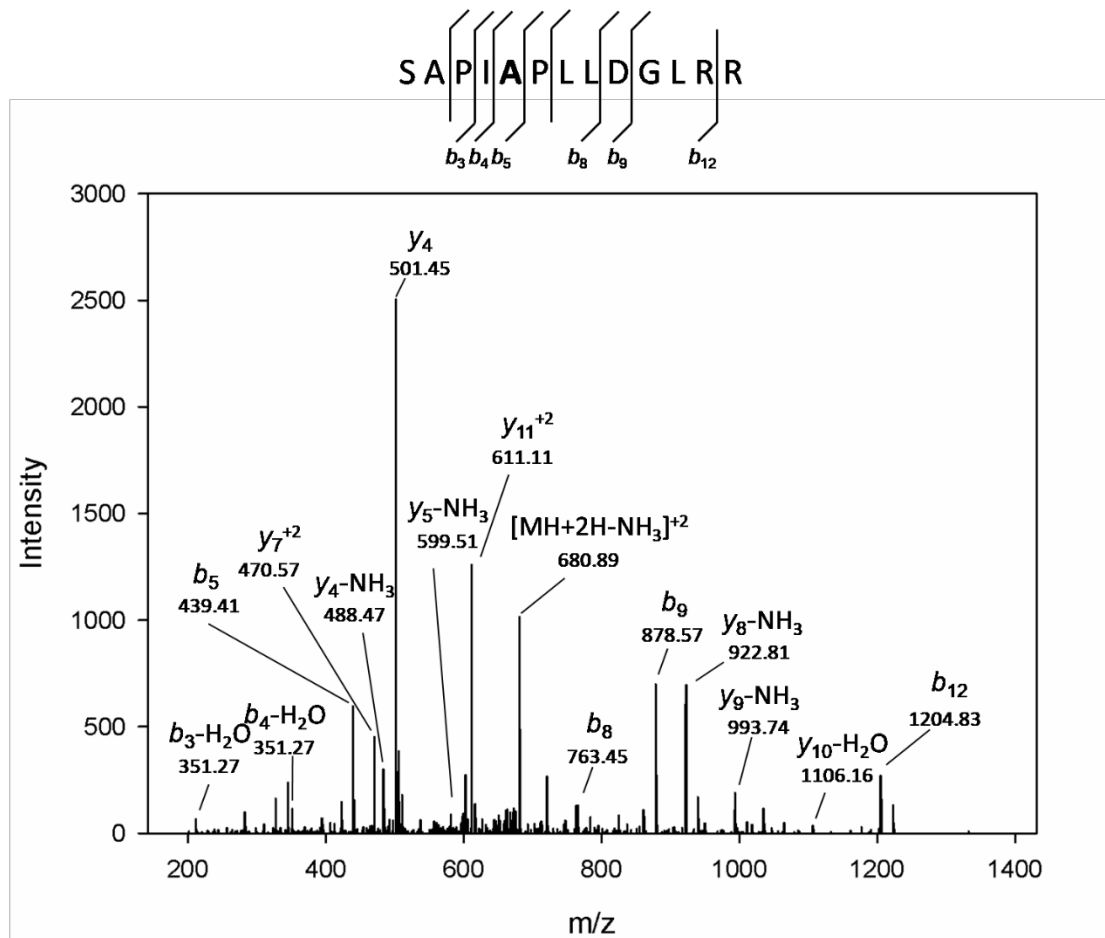

58

59

60 **Figure S6. Representative spectrum of peptide containing the R134A mutation obtained by**61 **LC-MS/MS of *M*sEPSPS R134A protein. Peptide sequence: SAPIAPLLDGLRR. Point mutation**62 **marked in bold. Fragment b- and y-ions and their neutral losses are indicated.**

63

64

65

66

67

68

69

70

71  
72**Table S1.** Fixed and varying concentrations of substrates used in kinetic assays of MsEPSPS.

| <b>EPSPS</b> | <b>Substrate</b> | <b>Fixed-saturating (<math>\mu\text{M}</math>)</b> | <b>Substrate</b> | <b>Varying range (<math>\mu\text{M}</math>)</b> |
|--------------|------------------|----------------------------------------------------|------------------|-------------------------------------------------|
| <b>WT</b>    | S3P              | 800                                                | PEP              | 25 - 900                                        |
| <b>D61W</b>  | S3P              | 600                                                | PEP              | 25 - 1200                                       |
| <b>E321N</b> | S3P              | 600                                                | PEP              | 25 - 10000                                      |
| <b>R134A</b> | S3P              | 600                                                | PEP              | 300 - 2900                                      |

73

74

75

## Supplementary Results

76

77 **MESG synthesis.** High-resolution mass spectra (HRMS) were obtained on an LTQ  
78 Orbitrap Discovery mass spectrometer (Thermo Fisher Scientific). This system  
79 combines an LTQ XL linear ion-trap mass spectrometer and an Orbitrap mass  
80 analyzer. The analyses were performed through the direct infusion of the sample in  
81 MeOH/H<sub>2</sub>O (1:1) with 0.1% formic acid (flow rate 10 mL/min) in a positive-ion mode  
82 using electrospray ionization (ESI). For elemental composition, calculations used the  
83 specific tool included in the Qual Browser module of Xcalibur (Thermo Fisher  
84 Scientific, release 2.0.7) software. <sup>13</sup>C NMR spectra were acquired on an Avance III  
85 HD Bruker spectrometer (Pontifical Catholic University of Rio Grande do Sul);  
86 chemical shifts ( $\delta$ ) were expressed in parts per million (ppm) relative to TMS  
87 (tetramethylsilane) used as an internal standard.

88

89

90

91

92

93

94

95

96



97

## References

98

- 99 [1] Rock JM, Hopkins FF, Chavez A, Diallo M, Chase MR, Gerrick ER, Fortune SM.  
100 2017. Programmable transcriptional repression in mycobacteria using an orthogonal  
101 CRISPR interference platform. *Nature Microbiology*, 2: 1–9.  
102 <https://doi.org/10.1038/nmicrobiol.2016.274>
